# Supplementary material for: Highly efficient colloidal MnxCd1−xS nanorod solid solution for photocatalytic hydrogen generation
Source: Royal Society of Chemistry journal article supplement (doi:10.1039/c8ta08458k), 2018-01-01
Supplement: c8ta08458k1.pdf [file c8ta08458k1.pdf]

## Electronic Supporting Information (ESI)

### Highly Efficient Colloidal $\text{Mn}_x\text{Cd}_{1-x}\text{S}$ Solid Solution Nanorods for Photocatalytic Hydrogen Generation

Ling Li,<sup>a</sup> Guoning Liu,<sup>a</sup> Shaopeng Qi,<sup>a</sup> Xindi Liu,<sup>a</sup> Liuyu Gu,<sup>a</sup> Yongbing Lou,<sup>\*a</sup> Jinxi Chen,<sup>\*a</sup> and Yixin Zhao<sup>\*b</sup>

- a. School of Chemistry and Chemical Engineering, Jiangsu Key Laboratory for Science and Application of Molecular Ferroelectrics, Jiangsu Engineering Laboratory of Smart Carbon-Rich Materials and Device, Southeast University, Nanjing, 211189, China, E-mail: lou@seu.edu.cn, chenjinxi@seu.edu.cn
- b. School of Environmental Science and Engineering, Shanghai Jiao Tong University, Shanghai, 200240, China, E-mail: yixin.zhao@sjtu.edu.cn

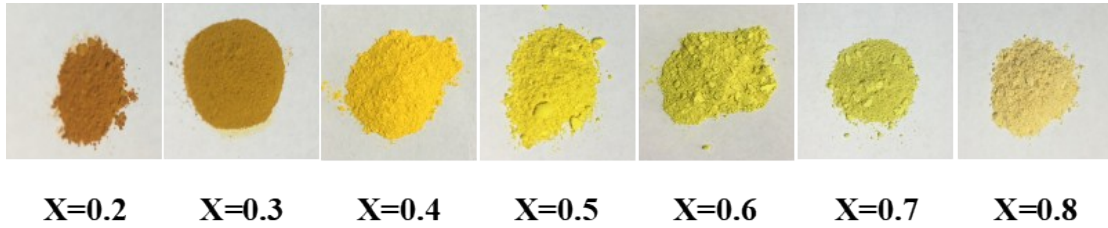

**Fig. S1** Digital photographs of synthesized  $Mn_xCd_{1-x}S$  samples.

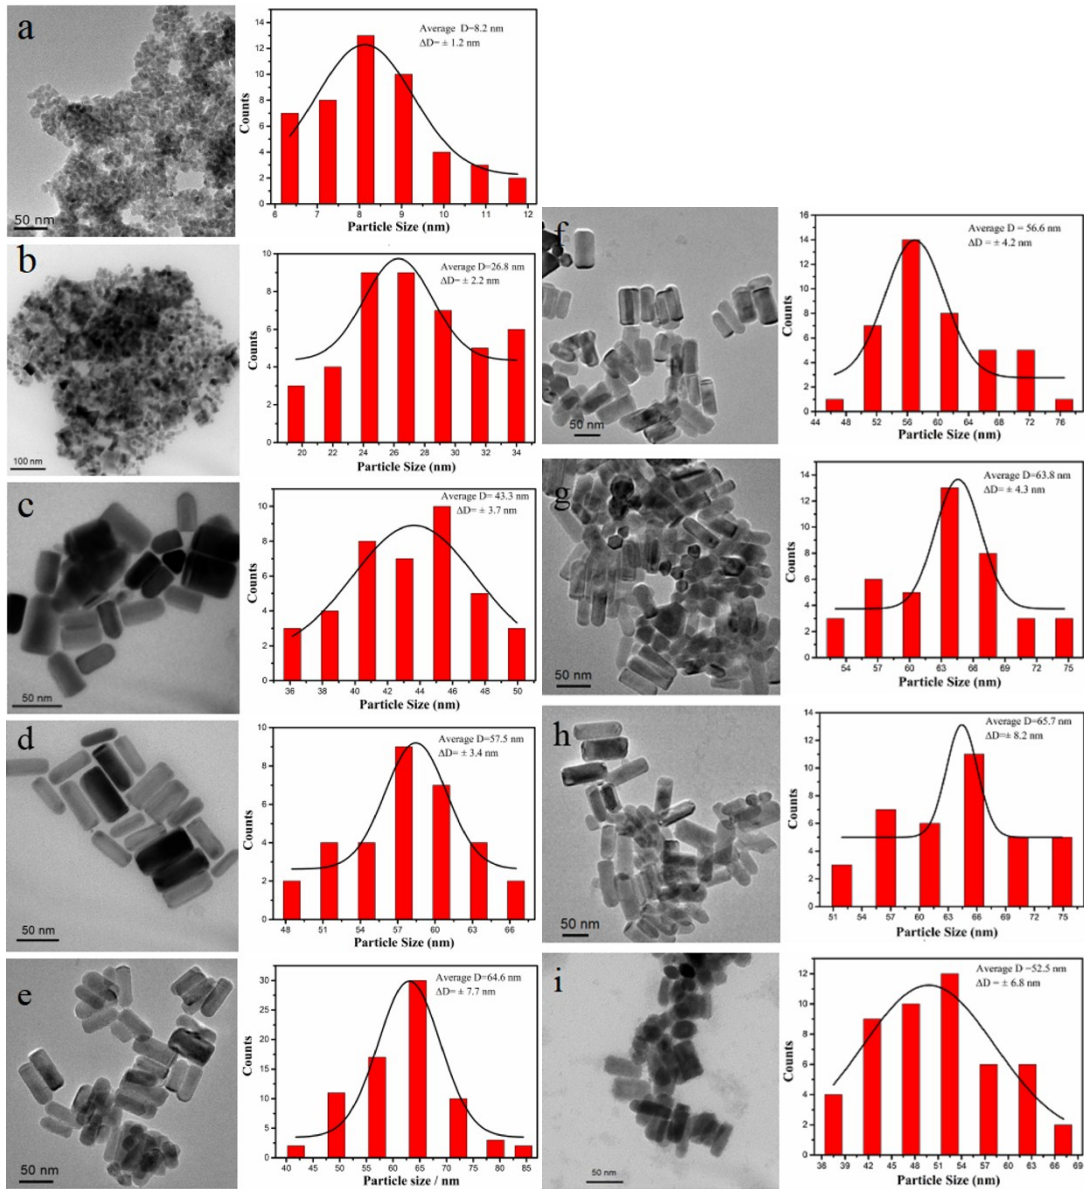

**Fig. S2** TEM and Size distribution histogram of  $Mn_xCd_{1-x}S$  solid solutions. ( a.  $x=0$ ; b.  $x=0.2$ ; c.  $x=0.3$ ; d.  $x=0.4$ ; e.  $x=0.5$ ; f.  $x=0.6$ ; g.  $x=0.7$ ; h.  $x=0.8$ ; i.  $x=1.0$  )

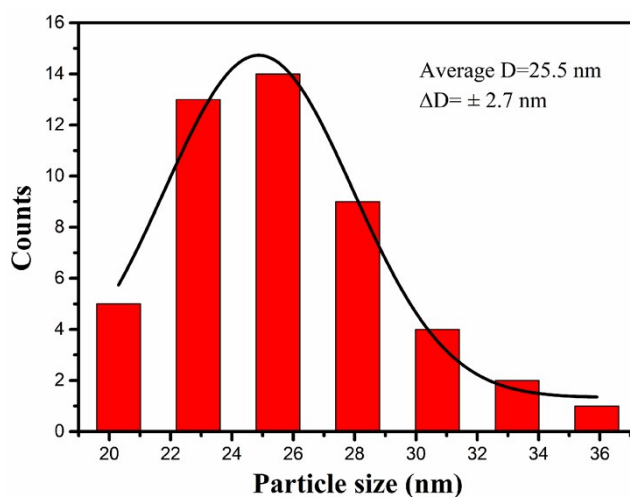

Fig. S3 Size distribution histogram of  $Mn_{0.5}Cd_{0.5}S$  nanorods (top of view).

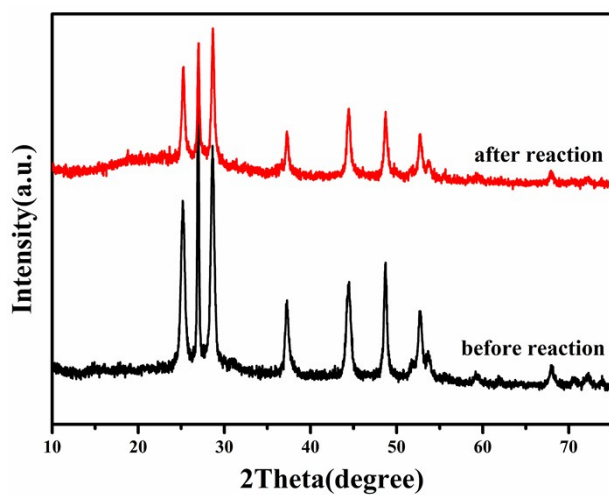

Fig. S4 XRD patterns of the  $Mn_{0.5}Cd_{0.5}S$  solid solution photocatalyst before and after the photocatalytic reactions.

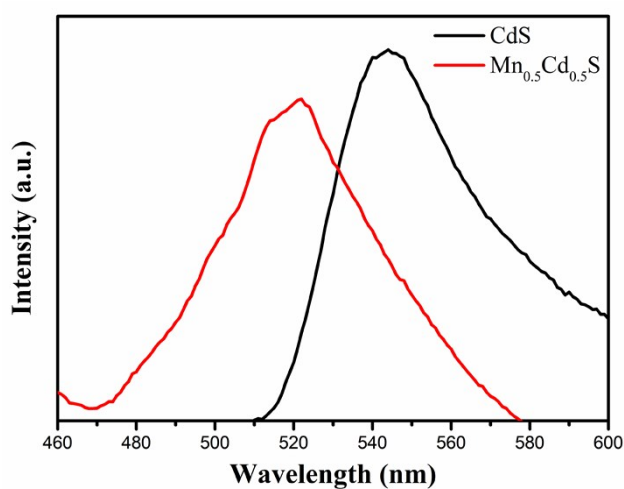

Fig. S5 Photoluminescence spectra of CdS (black) and  $Mn_{0.5}Cd_{0.5}S$  (red) in solution.

**Table. S1 Comparison of H<sub>2</sub> evolution rate with other Mn-Cd-S solid solutions.**

| No. | Photocatalyst                                                               | Rate of H <sub>2</sub> Evolution                                    | Method                         | Reference         |
|-----|-----------------------------------------------------------------------------|---------------------------------------------------------------------|--------------------------------|-------------------|
| 1   | Mn <sub>0.2</sub> Cd <sub>0.8</sub> S/CoP <sub>3</sub>                      | 29530 μmolg <sup>-1</sup> h <sup>-1</sup>                           | Hydrothermal method            | 1                 |
| 2   | Mn <sub>x</sub> Cd <sub>1-x</sub> S                                         | 355 μmolg <sup>-1</sup> h <sup>-1</sup>                             |                                | 2                 |
| 3   | Mn <sub>x</sub> Cd <sub>1-x</sub> S                                         | 10900 μmolg <sup>-1</sup> h <sup>-1</sup>                           |                                | 3                 |
| 4   | Mn <sub>0.25</sub> Cd <sub>0.75</sub> S/MoS <sub>2</sub>                    | 12470 μmolh <sup>-1</sup> g <sup>-1</sup>                           |                                | 4                 |
| 5   | Mn <sub>0.8</sub> Cd <sub>0.2</sub> S/g-C <sub>3</sub> N <sub>4</sub>       | 4000 μmolg <sup>-1</sup> h <sup>-1</sup>                            |                                | 5                 |
| 6   | Mn <sub>x</sub> Cd <sub>1-x</sub> S/NiS                                     | 8386 μmolh <sup>-1</sup> g <sup>-1</sup>                            |                                | 6                 |
| 7   | Cu <sub>2-x</sub> S/Mn <sub>0.5</sub> Cd <sub>0.5</sub> S/MoS <sub>2</sub>  | 13752 μmolg <sup>-1</sup> h <sup>-1</sup>                           |                                | 7                 |
| 8   | Ni doped Mn-Cd-S                                                            | 1020 μmolg <sup>-1</sup> h <sup>-1</sup>                            |                                | 8                 |
| 9   | Ag doped Mn-Cd-S                                                            | 4400 μmolg <sup>-1</sup> h <sup>-1</sup>                            |                                | 9                 |
| 10  | Zn <sub>1-x</sub> Cd <sub>x</sub> S solid solutions                         | 7420 μmolg <sup>-1</sup> h <sup>-1</sup>                            | thermolysis method             | 10                |
| 11  | ZnCdS dodecahedral cages                                                    | 5680 μmolg <sup>-1</sup> h <sup>-1</sup>                            | Sulfurization and ion exchange | 11                |
| 12  | NiS/ Zn <sub>x</sub> Cd <sub>1-x</sub> S/RGO                                | 7514 μmolg <sup>-1</sup> h <sup>-1</sup>                            | Hydrothermal method            | 12                |
| 13  | Cu <sup>2+</sup> doped In <sub>2x</sub> Zn <sub>3(1-x)</sub> S <sub>3</sub> | 790 μmolg <sup>-1</sup> h <sup>-1</sup>                             |                                | 13                |
| 14  | MnS/In <sub>2</sub> S <sub>3</sub>                                          | 8360 μmolh <sup>-1</sup> g <sup>-1</sup><br>(from H <sub>2</sub> S) | Solvothermal method            | 14                |
| 15  | <b>Mn<sub>x</sub>Cd<sub>1-x</sub>S</b>                                      | <b>26000 μmolg<sup>-1</sup>h<sup>-1</sup></b>                       | <b>Colloidal method</b>        | <b>This study</b> |

**Table. S2 PL lifetime fitting results for CdS and Mn<sub>0.5</sub>Cd<sub>0.5</sub>S**

| sample                                   | T1 / ns     | T2 / ns       |
|------------------------------------------|-------------|---------------|
| <b>CdS</b>                               | <b>6.31</b> | <b>123.44</b> |
| <b>Mn<sub>0.5</sub>Cd<sub>0.5</sub>S</b> | <b>7.60</b> | <b>162.38</b> |

The PL kinetic curves were fitted with bi-exponential decay function, thus providing two lifetimes, one fast decay component and one slow decay component. Fast decay components were usually associated with non-radiative recombination, while slow decay components were due to the radiative lifetime of free excitons.<sup>15</sup>

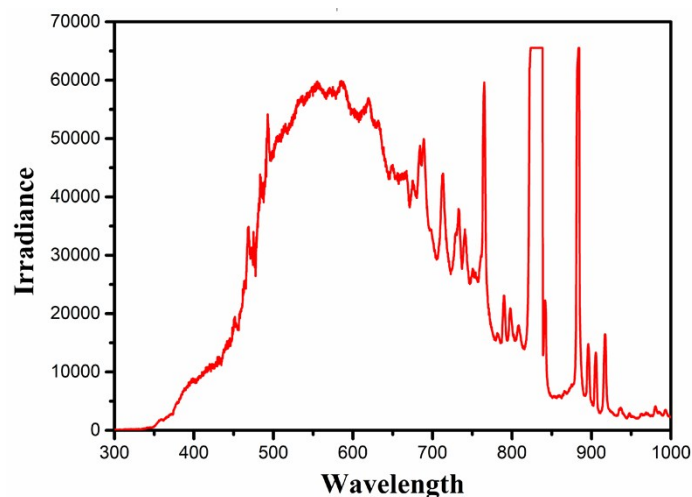

Fig. S6 Emission spectra of Xenon light source. (PLS-SXE300/300UV; PerfectLight, China.)

## Reference:

1. Q. Z. Huang, Z. J. Tao, L. Q. Ye, H. C. Yao and Z. J. Li, *Appl. Catal., B*, 2018, **237**, 689-698.
2. K. Ikeue, S. Shiiba and M. Machida, *Chem. Mater.*, 2010, **22**, 743-745.
3. M. Liu, L. Zhang, X. He, B. Zhang, H. Song, S. Li and W. You, *J. Mater. Chem. A*, 2014, **2**, 4619.
4. Q. Z. Huang, Y. Xiong, Q. Zhang, H. C. Yao and Z. J. Li, *Appl. Catal., B*, 2017, **209**, 514-522.
5. H. Liu, Z. Xu, Z. Zhang and D. Ao, *Appl. Catal., A*, 2016, **518**, 150-157.
6. X. Liu, X. Liang, P. Wang, B. Huang, X. Qin, X. Zhang and Y. Dai, *Appl. Catal., B*, 2017, **203**, 282-288.
7. X. Liu, Q. Liu, P. Wang, Y. Liu, B. Huang, E. A. Rozhkova, Q. Zhang, Z. Wang, Y. Dai and J. Lu, *Chem. Eng. J.*, 2018, **337**, 480-487.
8. K. Ikeue, S. Shiiba and M. Machida, *ChemSusChem*, 2011, **4**, 269-273.
9. K. Ikeue, Y. Shinmura and M. Machida, *Appl. Catal., B*, 2012, **123-124**, 84-88.
10. Q. Li, H. Meng, P. Zhou, Y. Zheng, J. Wang, J. Yu and J. Gong, *ACS Catal.*, 2013, **3**, 882-889.
11. J. Chen, J. Chen and Y. Li, *J. Mater. Chem. A*, 2017, **5**, 24116-24125.
12. J. Zhang, L. Qi, J. Ran, J. Yu and S. Z. Qiao, *Adv. Energy Mater.*, 2014, **4**, 1301925.
13. F. Li, G. Chen, J. Luo, Q. Huang, Y. Luo, Q. Meng and D. Li, *Catal. Sci. Technol.*, 2013, **3**, 1993.
14. M. Dan, Q. Zhang, S. Yu, A. Prakash, Y. Lin and Y. Zhou, *Appl. Catal., B*, 2017, **217**, 530-539.
15. Y. Zhong, A. B. Djurišić, Y. F. Hsu, K. S. Wong, G. Brauer, C. C. Ling, and W. K. Chan, *J. Phys. Chem. C*, 2008, **112**, 16286-16295.
